# Supplementary material for: Tunable electronic structures of germanium monochalcogenide nanosheets via light non-metallic atom functionalization: a first-principles study
Source: Royal Society of Chemistry journal article supplement (doi:10.1039/c6cp03724k), 2016-01-01
Supplement: c6cp03724k1.pdf [file c6cp03724k1.pdf]

# Supporting Information For

## Tunable Electronic Structures of Germanium Monochalcogenide Nanosheets by Light Non-metallic Atom Functionalization: A First-principles Study

Yi Ding<sup>a</sup>, and Yanli Wang<sup>b</sup>

a. Department of Physics, Hangzhou Normal University, Hangzhou, Zhejiang 310036, People's Republic of China. E-mail: dingyi2001@tsinghua.org.cn

b. Department of Physics, Center for Optoelectronics Materials and Devices, Zhejiang Sci-Tech University, Xiasha College Park, Hangzhou, Zhejiang 310018, People's Republic of China. E-mail: wangyanli-04@tsinghua.org.cn

### Contents:

#### 1. Orbitally decomposed total energies of favourable structures

The discrepancy of favourable structures is attributed to the facts that the O/S adatoms have much weaker O/S-Ge bonds in the  $E_1$  conformation than in the  $T$  one, and in the  $E_1$  conformation hollow-site S/Se atoms will suffer from a stronger repulsion from O/S adatoms. To quantitatively describe these effects, we have performed an OpenMX calculation on the O and N adatoms on GeS sheet, which decomposes the total energy into the contribution associated with each atomic basis function [1,2]. We find that comparing to the  $T$  conformation, the O adatom in the  $E_1$  case lowers the total energy by 0.576 eV, but the hollow-site S atom raises the total energy by 1.648 eV, which makes the  $E_1$  conformation unfavourable for O adatom. On the other hand, the N adatom can lower the total energy greatly by about 6.078 eV, while the hollow-site S atom only raises the total energy by 0.834 eV, which stabilizes the  $E_1$  conformation for N adatom.

- (1) T. Ozaki and H. Kino, Phys. Rev. B, 2005, **72**, 045121.
- (2) K. Lejaeghere, G. Bihlmayer, T. Bjorkman, P. Blaha, S. Blugel, V. Blum, D. Caliste, I. E. Castelli, S. J. Clark, A. Dal Corso, S. de Gironcoli, T. Deutsch, J. K. Dewhurst, I. Di Marco, C. Draxl, M. Dulak, O. Eriksson, J. A. Flores-Livas, K. F. Garrity, L. Genovese, P. Giannozzi, M. Giantomassi, S. Goedecker, X. Gonze, O. Granas, E. K. U. Gross, A. Gulans, F. Gygi, D. R. Hamann, P. J. Hasnip, N. A. W. Holzwarth, D. Iusan, D. B. Jochym, F. Jollet, D. Jones, G. Kresse, K. Koepnik, E. Kucubeni,

Y. O. Kvashnin, I. L. M. Locht, S. Lubeck, M. Marsman, N. Marzari, U. Nitzsche, L. Nordstrom, T. Ozaki, L. Paulatto, C. J. Pickard, W. Poelmans, M. I. J. Probert, K. Refson, M. Richter, G.-M. Rignanese, S. Saha, M. Scheffler, M. Schlipf, K. Schwarz, S. Sharma, F. Tavazza, P. Thunstrom, A. Tkatchenko, M. Torrent, D. Vanderbilt, M. J. van Setten, V. Van Speybroeck, J. M. Wills, J. R. Yates, G.-X. Zhang and S. Cottenier, *Science*, 2016, **351**, 6280.

2. Figure S1. PBE band structures of B adatom on the  $5\times 5$ ,  $6\times 6$ , and  $7\times 7$  supercells of GeS and GeSe sheets.

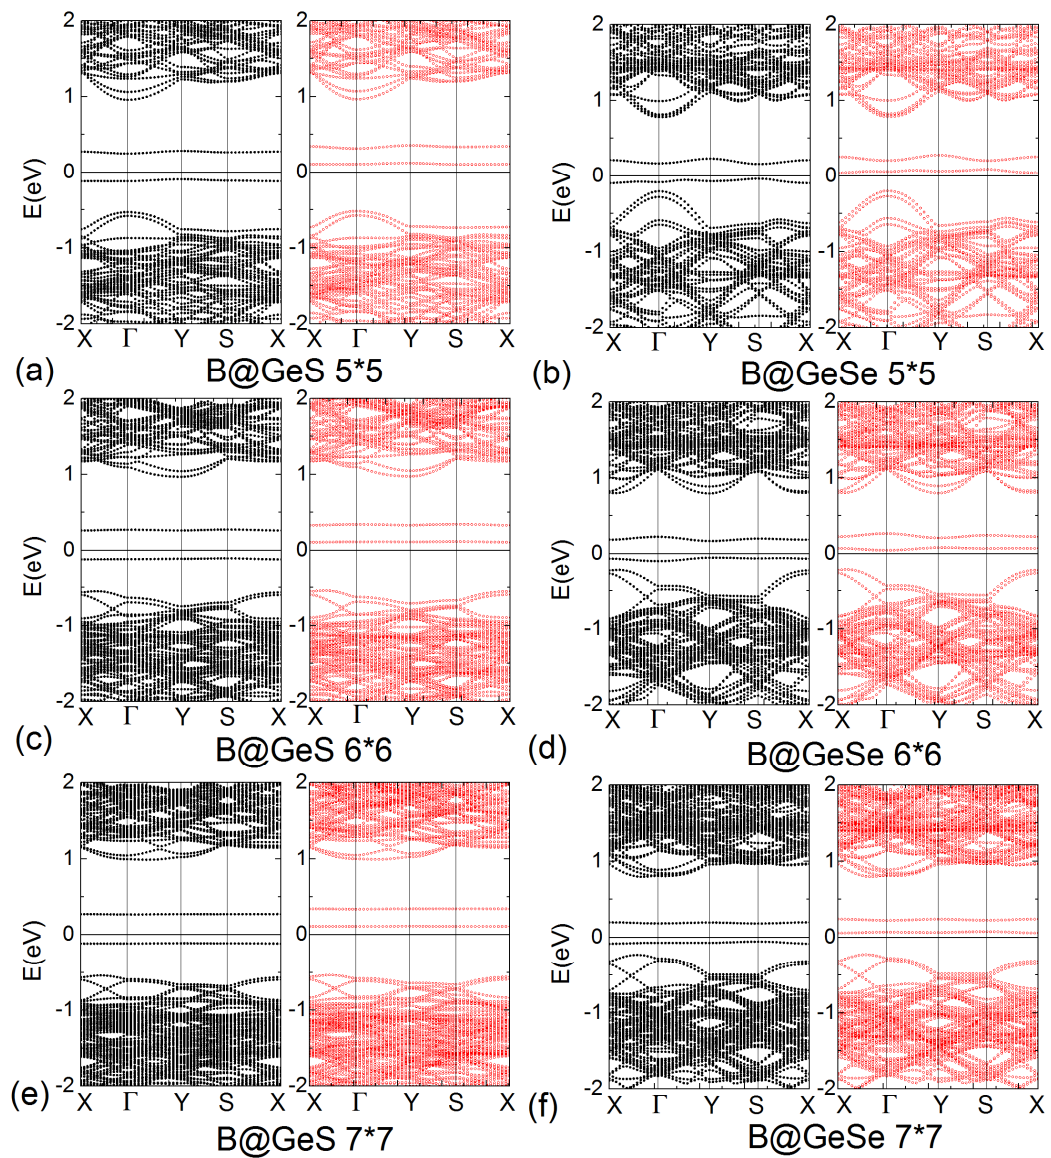

**Figure S1:** PBE band structures of B adatom on the  $5\times 5$ ,  $6\times 6$ , and  $7\times 7$  supercells of [(a), (c), (e)] GeS and [(b), (d), (f)] GeSe sheets..
